# Supplementary material for: Cancer-secreted exosomal miR-1468-5p promotes tumor immune escape via the immunosuppressive reprogramming of lymphatic vessels
Source: PubMed Central journal article supplement — Mol Ther. 2021 Jan 1;29(4):1512–28. doi: 10.1016/j.ymthe.2020.12.034 (PMC8058488; doi:10.1016/j.ymthe.2020.12.034), 2021-01-01
Supplement: mmc1.pdf [file mmc1.pdf]

## **Supplemental Information**

**Cancer-secreted exosomal miR-1468-5p promotes  
tumor immune escape via the immunosuppressive  
reprogramming of lymphatic vessels**

**Chenfei Zhou, Wenfei Wei, Jing Ma, Yang Yang, LuoJiao Liang, Yanmei Zhang, Zici Wang, Xiaojing Chen, Lei Huang, Wei Wang, and Sha Wu**

1 **Supplemental figures and legends**

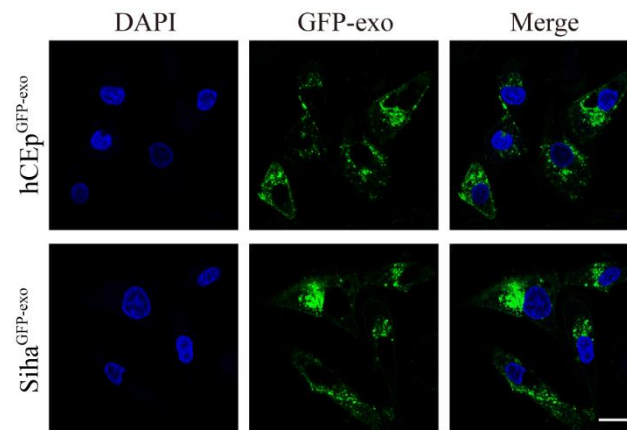

Figure S1

2

3 **Supplementary Figure S1. Siha and hCEp successfully were transfected with**  
4 **lentiviral-CD63-GFP, related to Fig. 3. Representative micrographs of Siha and**  
5 **hCEp transfected with lentiviral-CD63-GFP.**

6

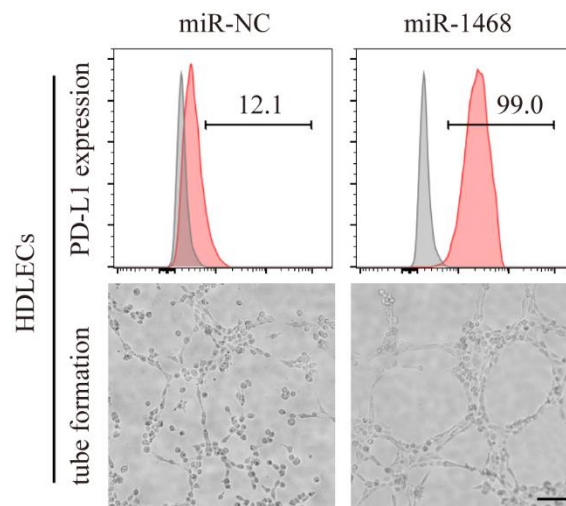

Figure S2

7

8 **Supplementary Figure S2. miR-1468-5p mimics contributed to PD-L1 expression**  
9 **and tube formation of HDLECs, related to Fig. 4. Flow cytometry analysis of PD-**  
10 **L1 expression and tube formation assay in HDLECs treated with miR-1468-5p mimics**

11 or NC. Scale bar, 10  $\mu$ m.

12

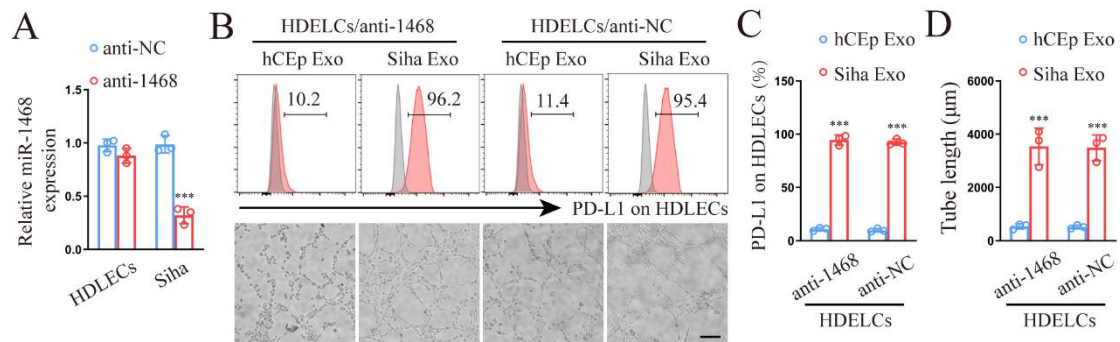

Figure S3

13

14 **Supplementary Figure S3. Cancer cells reprogrammed HDLECs by transferring**

15 **exosomal miR-1468-5p to HDLECs, related to Fig. 4.** (A) qRT-PCR analysis of miR-

16 1468-5p expression in HDLECs and Siha both stably transfected with lentiviral anti-

17 1468-5p or NC. (B) Flow cytometry analysis of PD-L1 expression and tube formation

18 assay in HDLECs/anti-1468-5p or HDLECs/anti-NC in the presence of hCEp-exo or

19 Siha-exo. Scale bar, 10  $\mu$ m. (C and D) Quantification of PD-L1 expression (C) and tube

20 formation (D) in HDLECs/anti-1468-5p or HDLECs/anti-NC in the presence of hCEp-

21 exo or Siha-exo. Error bars represent the mean  $\pm$  SD of three independent experiments.

22 \*\*\*,  $P < 0.001$ .

23

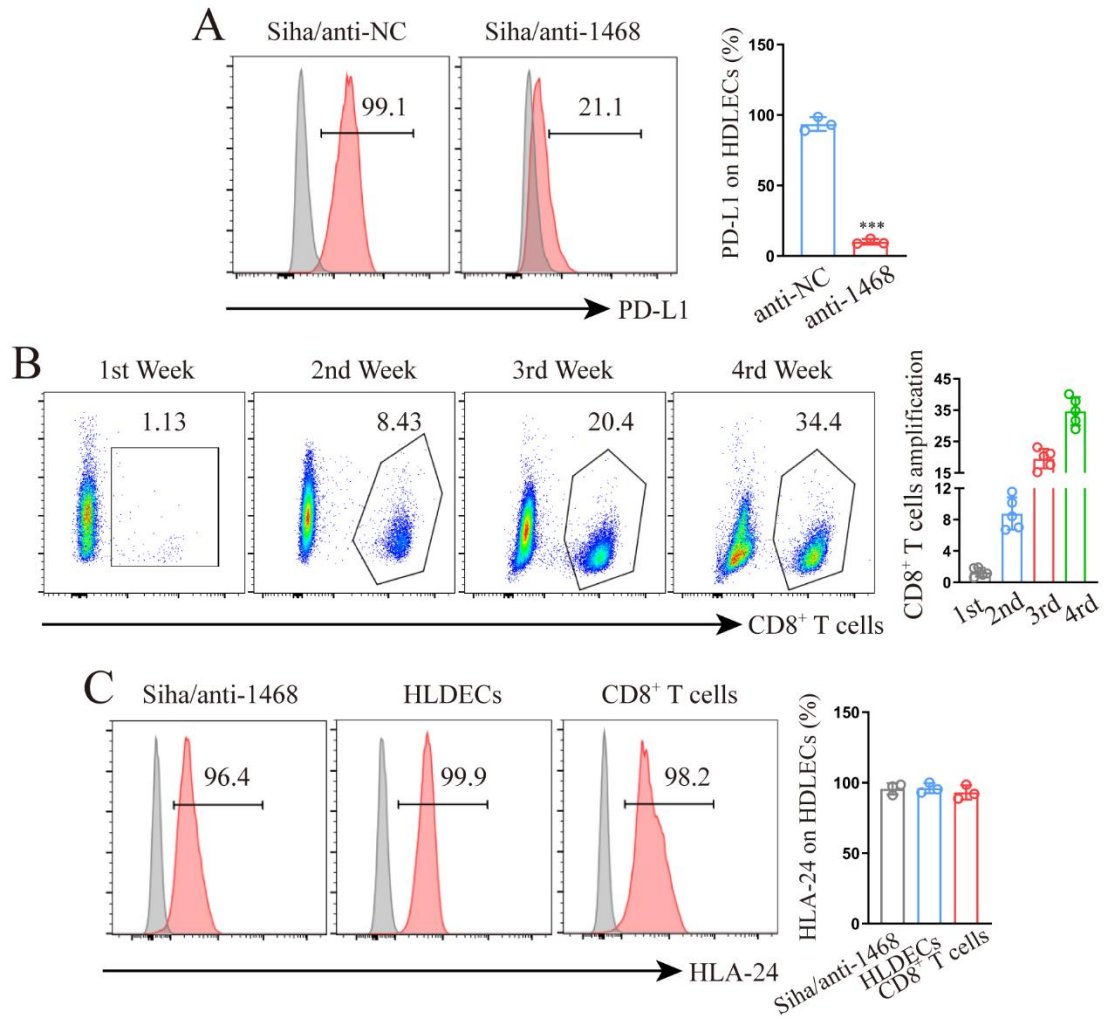

Figure S4

24

25 **Supplementary Figure S4. Flow cytometry analysis of PD-L1 and HLA-A24**

26 **expression, related to Fig. 5. (A) Flow cytometry analysis of PD-L1 expression on**

27 **Siha/anti-NC and Siha/anti-1468-5p. (B) Flow cytometry analysis of CD8<sup>+</sup> T cells**

28 **amplification *in vivo* at indicated time point. (C) Flow cytometry analysis of HLA-A24**

29 **expression on Siha/anti-1468-5p, HDLECs, and CD8<sup>+</sup> T cells. Error bars represent the**

30 **mean  $\pm$  SD of three independent experiments. \*\*\*, P<0.001.**

31

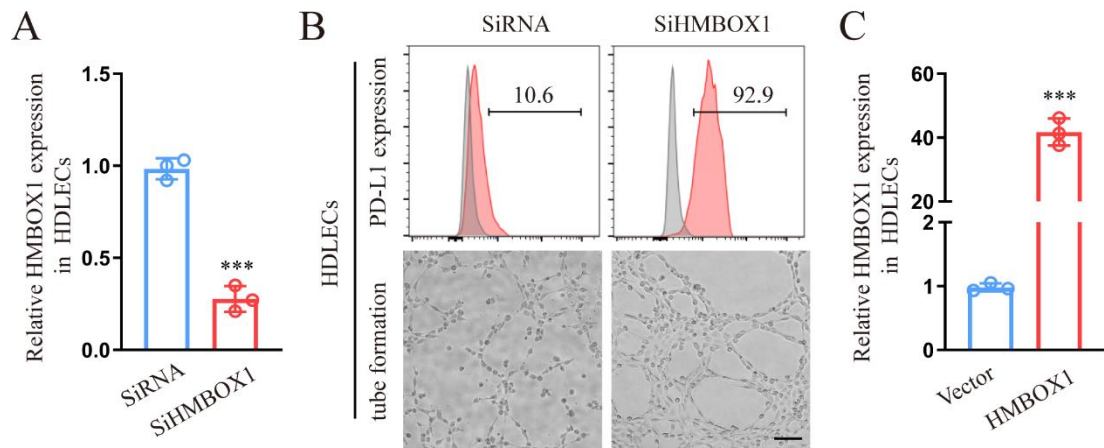

Figure S5

32

33 **Supplementary Figure S5. miR-1468-5p directly targets HMBOX1 in HDLECs**

34 **reprogramming, related to Fig. 6.** (A) qRT-PCR analysis of HMBOX1 expression in

35 HDLECs transfected with SiHMBOX1 or SiRNA. (B) Flow cytometry analysis of PD-

36 L1 and tube formation assay in HDLECs treated with SiHMBOX1 or SiRNA. Scale

37 bar, 10  $\mu$ m. (C) qRT-PCR analysis of HMBOX1 expression in HDLECs transfected

38 with HMBOX1 or vector. Error bars represent the mean  $\pm$  SD of three independent

39 experiments. \*\*\*,  $P < 0.001$ .

40

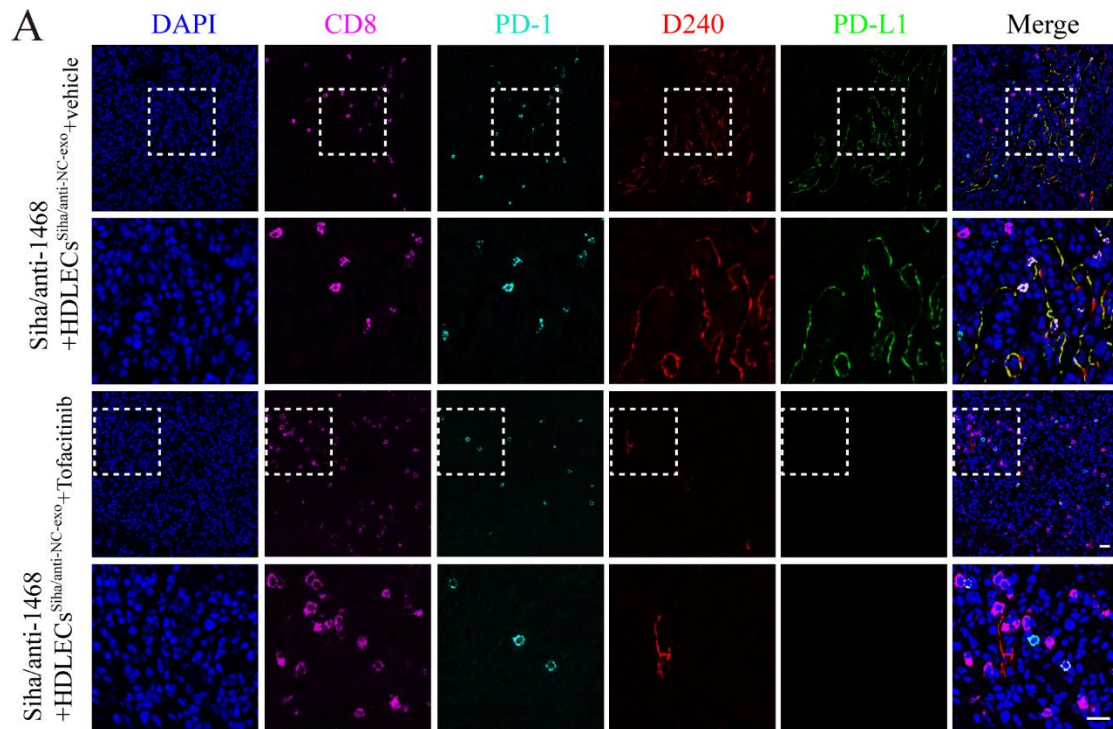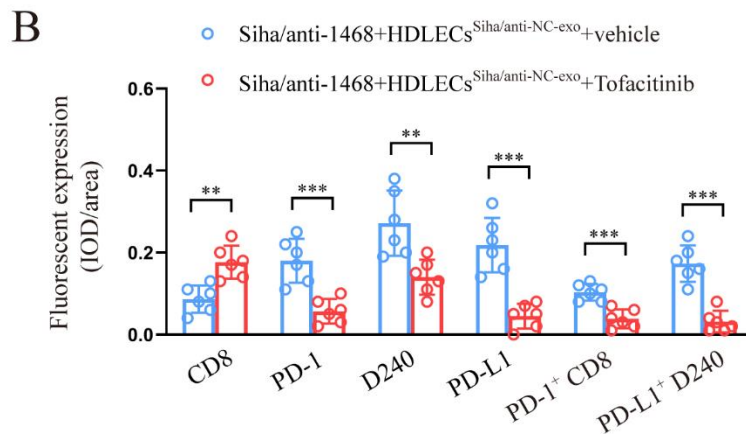

Figure S6

41

42 **Supplementary Fig S6. JAK/STAT inhibitor neutralizes the effect of exosomal**  
 43 **miR-1468-5p-induced CD8<sup>+</sup> T cell immunosuppression *in vivo*, related to Fig. 7.**

44 (A) Representative micrographs of CD8, PD-1, lymphatics, and PD-L1  
 45 immunofluorescence staining in sections of xenograft tumors. Scale Bar: 20  $\mu$ m. (B)

46 Quantification of CD8, PD-1, lymphatics, PD-L1, PD-1<sup>+</sup> CD8, and PD-L1<sup>+</sup> lymphatics  
 47 expression in indicated groups. Error bars represent the mean  $\pm$  SD of three independent

48 experiments. \*\*, P<0.01; \*\*\*, P<0.001.

49

50 **Supplementary Tables**

51 **Table S1. Detailed primer sequences in the study**

52

|         | Forward                  | Reverse                   |
|---------|--------------------------|---------------------------|
| MCMBP   | CTGCCCAGCAATACTTCCCTT    | TTCTGCCACGTTATGAGGTTG     |
| ZNF501  | AACTTTCCGCAAACAAGCACA    | TCCCACATCCAACACACTCATA    |
| HMBOX1  | CACCAACTCGCTACCATGCAA    | TCCGATTGGCAAGAAAGGCTT     |
| PRRT2   | TTCTGTCTGAGAGTGTAGGGG    | CAGGCTACCTCGGGGAGAT       |
| SV2A    | TATTCCCGAAGATCGTACTCCC   | GCCCTCAGTAGCATCACTGG      |
| MLH3    | TCTCTCACTCATGCACCCTTC    | TCGGGAACATACGTCTTTGGT     |
| LCORL   | GAGGAGCTATCATCTCAGGGC    | TGAGCAACTAGGGGAATGTTAGG   |
| GAPDH   | CCATCAATGACCCCTTCATTGACC | GAAGGCCATGCCAGTGAGCTTCC   |
| SiARID2 | GGAGAUGGUUCUCAUUUAATT    | UUAAAUGAGAACCAUCUCCTT     |
| SiRNA   | GCAGUUGUUGCACAGGUAATT    | UUACCUGUGCAACAACUGCTT     |
| HBS1    | CTTCCAGGAGAGAAGCCGTCT    | GCTGTAATTTGCACACGTGTTTGTG |
| HBS2    | CTCGCACGACAATCGGAATCAC   | CAGATTGGGAGCTCTGGACCT     |
| HBS3    | CCAGCCTCAGTTTCTTCCGC     | CGCCCTGCTGTCCCGAA         |
| HBS4    | TCTGAGAGCTGTCTGTAGAGGGC  | CTACTGCTCCGTCAGGCATC      |

53
